# Supplementary material for: The kinase PDK1 is critical for promoting T follicular helper cell differentiation
Source: eLife. 2021 Feb 17;10:e61406. doi: 10.7554/eLife.61406 (PMC7889074; doi:10.7554/eLife.61406)
Supplement: Figure 1—source data 1. [file elife-61406-fig1-data1.xlsx]

## Sheet: Fig1
Figure 1-source data 1
PDK1 supports Tfh cell differentiation and effector functions
Figure 1 A
	Naïve CD4+ T	Th1	Tfh
	589	976	1103
	475	810	889
	556	912	1050
	494	971	1186
	512	819	931
	442	764	868
	629	531	875
	626	598	861
Figure 1 B
	WT	Pdk1fl/fl::Cd4-Cre
	45.42	2.45
	44.87	0.66
	38.7	2.59
Figure 1 C and D
	% (CD44+CXCR5+ Tfh)			N (CD44+CXCR5+ Tfh)x106
	WT	Pdk1fl/fl::Cd4-Cre		WT	Pdk1fl/fl::Cd4-Cre
	19.6	2.07		1.15809	0.0209432
	20.1	2.27		1.46849	0.04862
	31.9	2.64		2.00172	0.0571903
	22.7	6.71		1.73099	0.0815265
	20.3	6.85		1.22168	0.0794792
	21.4	3.95		1.70329	0.14726
	29.2	4.77		2.81541	0.0617548
	37.4	6.39		2.85691	0.0668554
	% (CD44-CXCR5+ Th1)			N (CD44-CXCR5+ Th1)x106
	WT	Pdk1fl/fl::Cd4-Cre		WT	Pdk1fl/fl::Cd4-Cre
	19.3	54		1.14036	0.546345
	28.5	64.6		2.08219	1.38363
	31.3	55.2		1.96408	1.1958
	28	37.5		2.13514	0.455625
	32.8	44.1		1.97395	0.511683
	32.2	23.8		2.5629	0.887288
	22.3	43.1		2.15012	0.557994
	20.5	40.1		1.56595	0.419546
	% (PD-1hiCXCR5+ GCTfh)			N (PD-1hiCXCR5+ GCTfh)x106
	WT	Pdk1fl/fl::Cd4-Cre		WT	Pdk1fl/fl::Cd4-Cre
	13.6	0.59		0.565867	0.00478874
	15.2	1.58		0.684006	0.00965671
	12.3	1.57		0.543874	0.00912278
	9.47	2.79		0.218735	0.0151672
	13.3	1.83		0.441394	0.0124634
	12.6	0.16		0.3886	0.000988174
	% (Bcl-6hiCXCR5+ GCTfh)			N (Bcl-6hiCXCR5+ GCTfh)x106
	WT	Pdk1fl/fl::Cd4-Cre		WT	Pdk1fl/fl::Cd4-Cre
	9.21	2.13		0.208616	0.0090097
	9.95	3.63		0.343191	0.0469737
	7.05	2.04		0.26769	0.0196168
	15.6	2.86		0.583759	0.0118543
	11.3	2.5		0.344762	0.0104252
	11.4	4.19		0.465545	0.0332068
	11.5	0.8		0.525805	0.00411
	13.7	1.13		0.571046	0.0042497
Figure 1 E and F	MFI (PD-1)			MFI (ICOS)			MFI (Bcl-6)
	WT	Pdk1fl/fl::Cd4-Cre		WT	Pdk1fl/fl::Cd4-Cre		WT	Pdk1fl/fl::Cd4-Cre
	1519	353		1246	208		1658	960
	1326	444		1387	288		1735	1013
	1322	461		905	234		1120	740
	1110	598		1090	275		919	530
	1576	633		1493	264		1559	1292
	1412	159		1156	300		1626	869
Figure 1 G
	WT	Pdk1fl/fl::Cd4-Cre
	0.276528	0.07917
	0.205055	0.031082
	0.506421	0.085024
	0.54008	0.050574
	0.379996	0.004764
		0.013698
Figure 1 H and I
	% (PNA+Fas+ GC B)			N (PNA+Fas+ GC B)x106
	WT	Pdk1fl/fl::Cd4-Cre		WT	Pdk1fl/fl::Cd4-Cre
	6.6	0.5		0.90288	0.09025
	8.78	0.49		2.38577	0.0798504
	6.51	0.48		0.672613	0.0756024
	7.39	0.78		1.18122	0.16006
	% (B220-CD138+ Plasma cell)			N (B220-CD138+ Plasma cell)x106
	WT	Pdk1fl/fl::Cd4-Cre		WT	Pdk1fl/fl::Cd4-Cre
	2.95	0.86		2.124	0.4085
	3.07	0.74		5.45232	0.2072
	2.07	0.37		1.52766	0.20165
	1.72	0.53		1.9092	0.24115
Figure 1 K
	day 8	WT							Pdk1fl/fl::Cd4-Cre
	1:30	1.1257	0.9433	1.2735	1.3678	0.9179	1.0856	1.2457	0.3242	0.4448	0.4827	0.3621	0.3599	0.7099	0.4805
	1:90	0.8073	0.7752	0.8777	0.9658	0.5913	0.6936	0.7318	0.305	0.3195	0.3647	0.3106	0.2997	0.6649	0.4357
	1:270	0.5442	0.6252	0.5954	0.6855	0.4428	0.5737	0.4691	0.234	0.2549	0.2977	0.2528	0.2965	0.5314	0.3714
	1:810	0.4201	0.4905	0.4037	0.4665	0.3557	0.3833	0.3416	0.3067	0.2397	0.2449	0.2233	0.2963	0.4829	0.3106
	day 56	WT								Pdk1fl/fl::Cd4-Cre
	1:30	1.785	1.747	1.842	1.504	1.563	1.572	1.736	1.336	0.287	0.422	0.298	0.253	0.301	0.163	0.397	0.106
	1:90	1.365	1.389	1.536	1.309	1.174	1.256	1.397	1.072	0.169	0.2	0.117	0.097	0.142	0.09	0.275	0.09
	1:270	1.039	1.071	1.166	1.026	0.807	1.074	1.041	0.74	0.091	0.111	0.083	0.064	0.074	0.058	0.167	0.051
	1:810	0.816	0.725	0.878	0.739	0.535	0.8	0.677	0.528	0.058	0.076	0.057	0.057	0.048	0.041	0.132	0.06
