# Supplementary material for: The kinase PDK1 is critical for promoting T follicular helper cell differentiation
Source: eLife. 2021 Feb 17;10:e61406. doi: 10.7554/eLife.61406 (PMC7889074; doi:10.7554/eLife.61406)
Supplement: Figure 2—figure supplement 1—source data 1. [file elife-61406-fig2-figsupp1-data1.xlsx]

## Sheet: Fig2-S1
Figure 2-figure supplement1-source data 1
Analysis of distinct T helper subsets upon KLH immunization
Figure 2-S1 A and B
	% (IFN-γ)			% (IL-4)			% (IL-17a)
	WT	Pdk1fl/fl::Cd4-Cre		WT	Pdk1fl/fl::Cd4-Cre		WT	Pdk1fl/fl::Cd4-Cre
	1.89	4.45		0.32	1.16		4.78	6.97
	2.54	3.58		0.34	1.31		6.92	6.59
	3.52	5		0.39	0.78		7.36	9.92
	1.16	3.98		0.35	1.15		2.17	11
	3.11	4.18		0.57	1.44		4.48	7.22
	3.82	4.73		0.68	1.16		5.69	5.92
