# Supplementary material for: The kinase PDK1 is critical for promoting T follicular helper cell differentiation
Source: eLife. 2021 Feb 17;10:e61406. doi: 10.7554/eLife.61406 (PMC7889074; doi:10.7554/eLife.61406)
Supplement: Figure 2—source data 1. [file elife-61406-fig2-data1.xlsx]

## Sheet: Fig2
Figure 2-source data 1
PDK1 is essential for Tfh cell differentiation and GC responses upon KLH immunization
Figure 2 A and B
	% (CD44+CXCR5+ Tfh)			N (CD44+CXCR5+ Tfh)x106
	WT	Pdk1fl/fl::Cd4-Cre		WT	Pdk1fl/fl::Cd4-Cre
	17.5	8.16		1.65847	0.267165
	18	2.83		1.67443	0.0369077
	14.5	1.89		1.07184	0.0329767
	% (CD44+CXCR5- Th1)			N (CD44+CXCR5- Th1)x106
	WT	Pdk1fl/fl::Cd4-Cre		WT	Pdk1fl/fl::Cd4-Cre
	28.4	39.2		2.69147	1.28344
	23.1	34.4		2.14885	0.448631
	20.9	19.1		1.54493	0.333257
	% (PD-1hiCXCR5+ GCTfh)			N (PD-1hiCXCR5+ GCTfh)x106
	WT	Pdk1fl/fl::Cd4-Cre		WT	Pdk1fl/fl::Cd4-Cre
	14.6	1.28		0.546539	0.0158832
	13.9	0.24		0.424115	0.00075746
	11.1	1.19		0.247795	0.00307294
	% (Bcl-6hiCXCR5+ GCTfh)			N (Bcl-6hiCXCR5+ GCTfh)x106
	WT	Pdk1fl/fl::Cd4-Cre		WT	Pdk1fl/fl::Cd4-Cre
	8.87	1.73		0.298884	0.0218513
	13.7	2.14		0.439753	0.00315451
	9.24	2.67		0.220772	0.00342418
Figure 2 C and D
	MFI (PD-1)			MFI (ICOS)			MFI (Bcl-6)
	WT	Pdk1fl/fl::Cd4-Cre		WT	Pdk1fl/fl::Cd4-Cre		WT	Pdk1fl/fl::Cd4-Cre
	814	278		929	289		619	267
	668	200		1027	679		847	353
	517	285		1061	463		736	489
Figure2 E and F
	% (PNA+Fas+ GC B)			N (PNA+Fas+ GC B)x106
	WT	Pdk1fl/fl::Cd4-Cre		WT	Pdk1fl/fl::Cd4-Cre
	6.54	0.44		1.35896	0.105537
	6.12	0.37		1.61304	0.0312576
	6	0.29		0.76032	0.029232
	% (B220-CD138+ Plasma cell)			N (B220-CD138+ Plasma cell)x106
	WT	Pdk1fl/fl::Cd4-Cre		WT	Pdk1fl/fl::Cd4-Cre
	0.57	0.27		0.88008	0.14904
	0.41	0.18		0.43624	0.1368
	0.33	0.19		0.2508	0.15808
