# Supplementary material for: The kinase PDK1 is critical for promoting T follicular helper cell differentiation
Source: eLife. 2021 Feb 17;10:e61406. doi: 10.7554/eLife.61406 (PMC7889074; doi:10.7554/eLife.61406)
Supplement: Figure 3—source data 1. [file elife-61406-fig3-data1.xlsx]

## Sheet: Fig3
Figure 3-source data 1
PDK1 intrinsically programs Tfh cell differentiation
Figure 3 C , D and E
	% (CD45.2+CD44+CXCR5+ Tfh)			N (CD45.2+CD44+CXCR5+ Tfh)x106
	WT	Pdk1fl/fl::Cd4-Cre		WT	Pdk1fl/fl::Cd4-Cre
	23.1	0.35		1.66147	0.0279849
	23.1	0.8		1.4931	0.0384584
	19.6	0.61		1.41456	0.0453617
	28.3	4.24		1.12044	0.189973
	% (CD45.2+PD-1hiCXCR5+ GCTfh)			N (CD45.2+PD-1hiCXCR5+ GCTfh)x106
	WT	Pdk1fl/fl::Cd4-Cre		WT	Pdk1fl/fl::Cd4-Cre
	23	0.041		0.530455	0.00104423
	25.1	0.25		0.409289	0.00383761
	23.3	0.18		0.416643	0.00413626
	30.6	0.25		0.322424	0.00300149
	% (CD45.2+Bcl-6hiCXCR5+ GCTfh)			N (CD45.2+Bcl-6hiCXCR5+ GCTfh)x106
	WT	Pdk1fl/fl::Cd4-Cre		WT	Pdk1fl/fl::Cd4-Cre
	29.7	0.87		0.28138	0.0119132
	27.9	0.87		0.25494	0.0106198
	22.1	0.73		0.303676	0.0110044
	31.3	0.68		0.298822	0.00517428
Figure 3 F and G
	MFI (PD-1)			MFI (ICOS)			MFI (Bcl-6)
	WT	Pdk1fl/fl::Cd4-Cre		WT	Pdk1fl/fl::Cd4-Cre		WT	Pdk1fl/fl::Cd4-Cre
	859	174		1745	229		696	541
	384	224		908	279		581	470
	413	163		1094	259		699	502
	274	89.4		732	88.9		717	495
