# Supplementary material for: The kinase PDK1 is critical for promoting T follicular helper cell differentiation
Source: eLife. 2021 Feb 17;10:e61406. doi: 10.7554/eLife.61406 (PMC7889074; doi:10.7554/eLife.61406)
Supplement: Figure 4—figure supplement 1—source data 1. [file elife-61406-fig4-figsupp1-data1.xlsx]

## Sheet: Fig4-S1
Figure 4-figure supplement 1-source data 1
Analysis of apoptosis of CD4 T and Tfh cells
Figure 4-S1 A
	% (CD4-Caspase-3+ cell)			% (Tfh-Caspase-3+ cell)
	WT	Pdk1fl/fl::Rosa26CreER		WT	Pdk1fl/fl::Rosa26CreER
	18.3	21.2		16	14.8
	21.4	19.6		18.6	15.5
	19.4	20.3		18.2	16.5
	18	35.1		18.8	47.8
	19.4	22.2		19.2	28.3
	20.7	16.7		20.2	23.3
Figure 4-S1 B
	% (CD4-Caspase-3+ cell)			% (Tfh-Caspase-3+ cell)
	WT	Pdk1fl/fl::Rosa26CreER		WT	Pdk1fl/fl::Rosa26CreER
	22.7	23.9		18.5	15.9
	27.1	20.5		23.2	16.6
	23.6	27.8		21.3	25.6
	23.4	25.1		21.2	19.9
	24.6	22		21.8	17.2
		21.6			17.7
