# Supplementary material for: The kinase PDK1 is critical for promoting T follicular helper cell differentiation
Source: eLife. 2021 Feb 17;10:e61406. doi: 10.7554/eLife.61406 (PMC7889074; doi:10.7554/eLife.61406)
Supplement: Figure 4—source data 1. [file elife-61406-fig4-data1.xlsx]

## Sheet: Fig4
Figure 4-source data 1
PDK1 is essential for Tfh cell differentiation at both early and late stage
Figure 4 B
	WT	Pdk1fl/fl::Rosa26CreER
	31.82	3.257
	32.34	2.028
	29	2.769
	43.7	15.2
	39.32	8.226
	37.85	17.27
Figure 4 C
	% (Bcl-6hiCXCR5+ Tfh)			N (Bcl-6hiCXCR5+ Tfh)x106
	WT	Pdk1fl/fl::Rosa26CreER		WT	Pdk1fl/fl::Rosa26CreER
	25	7.48		0.586893	0.0623627
	18.8	8.32		0.513513	0.05883
	19.9	6.92		0.404044	0.0466613
Figure 4 D
	% (CD4-BrdU+ cell)			% (Tfh-BrdU+ cell)
	WT	Pdk1fl/fl::Rosa26CreER		WT	Pdk1fl/fl::Rosa26CreER
	17.5	8.1		25	11
	12.9	9.02		17.9	15.7
	12.1	7.47		16.7	12.1
	13.4	5.56		17.9	7.9
	8.46	7.33		11.2	12.3
	13.5	9.52		18.3	13.9
Figure 4 E
	Tcf7			Cxcr5			Bcl6			Pdcd1
	WT	Pdk1fl/fl::Rosa26CreER		WT	Pdk1fl/fl::Rosa26CreER		WT	Pdk1fl/fl::Rosa26CreER		WT	Pdk1fl/fl::Rosa26CreER
	1.03538	0.65793		1.01259	0.41704		1.11378	0.46175		1.01066	0.31264
	0.91764	0.70127		0.90485	0.49356		0.89827	0.61148		0.84363	0.43596
	1.04698	0.6032		1.08257	0.45463		0.98795	0.47048		1.14571	0.33844
Figure 4 G
	WT	Pdk1fl/fl::Rosa26CreER
	63.42	13.27
	82.75	47.15
	66.37	20.79
	60.72	23.53
	52.45	8.78
		9.922
Figure 4 H
	% (CD44+CXCR5+ Tfh)			N (CD44+CXCR5+ Tfh)x106
	WT	Pdk1fl/fl::Rosa26CreER		WT	Pdk1fl/fl::Rosa26CreER
	38.7	16.9		3.45607	1.35146
	27.6	18.3		3.71871	1.58917
	41.8	29.6		4.77791	2.70852
	37.4	22.8		4.12223	2.15296
	31.8	19.4		3.46811	1.56581
		16.3			1.40832
	% (Bcl-6hiCXCR5+ GC Tfh)			N (Bcl-6hiCXCR5+ GC Tfh)x106
	WT	Pdk1fl/fl::Rosa26CreER		WT	Pdk1fl/fl::Rosa26CreER
	17.6	4.1		0.961849	0.0932921
	17.7	8.13		1.3813	0.23395
	14.8	6.16		1.04436	0.287431
	12.2	5.31		1.01837	0.236239
	9.86	6.06		0.640161	0.1373
		4.34			0.0877491
Figure 4 I
	% (CD4-BrdU+ cell)			% (Tfh-BrdU+ cell)
	WT	Pdk1fl/fl::Rosa26CreER		WT	Pdk1fl/fl::Rosa26CreER
	3.89	1.14		3.32	1.57
	2.57	1.82		2.85	2.3
	2.9	0.69		2.23	0.78
	2.89	2.12		2.48	1.69
	4	1.82		3.58	1.74
		0.67			0.64
