# Supplementary material for: The kinase PDK1 is critical for promoting T follicular helper cell differentiation
Source: eLife. 2021 Feb 17;10:e61406. doi: 10.7554/eLife.61406 (PMC7889074; doi:10.7554/eLife.61406)
Supplement: Figure 5—source data 1. [file elife-61406-fig5-data1.xlsx]

## Sheet: Fig5
Figure 5-source data 1
ICOS-dependent PDK1 activity regulates Tfh cell transcriptional files
Figure 5 D				Figure 5 F and G
	Tcf7				Blank	CD3e+CD28	CD3 and ICOS	CD3 and CD28 and ICOS	ICOS	CD25
	WT	Pdk1fl/fl::Cd4-Cre			1761	2177	2857	2846	2735	1628
	1.00267	0.28503			1877	1945	2843	2452	2380	1880
	0.91753	0.29885			1727	2202	2769	2577	2417	1839
	0.92238	0.30014
	0.95742	0.13551
	1.05665	0.58959
	1.14335	0.31252
	Cxcr5
	WT	Pdk1fl/fl::Cd4-Cre
	1.02986	0.21398
	0.83746	0.18009
	0.87366	0.19571
	0.92417	0.05907
	0.97783	0.38033
	1.35703	0.23922
	Bcl6
	WT	Pdk1fl/fl::Cd4-Cre
	1.02785	0.75706
	0.9228	0.79893
	0.87493	0.65009
	0.88753	0.68721
	1.15161	0.51826
	1.13528
	Icos
	WT	Pdk1fl/fl::Cd4-Cre
	0.82072	0.30032
	0.90911	0.30949
	0.73362	0.44142
	1.00357	0.11906
	0.94546	0.28007
	1.58753	0.21578
	Maf
	WT	Pdk1fl/fl::Cd4-Cre
	1.36591	0.489991
	0.773395	0.549321
	0.425475	0.531903
	1.09203	0.406571
	1.09295
	1.25024
	Hif1a
	WT	Pdk1fl/fl::Cd4-Cre
	1.23401	0.567543
	0.53439	0.227627
	0.593499	0.39835
	1.82923	0.153644
	1.36149	0.535687
	0.447378	0.335791
	1.09617	0.698648
	1.09953	0.850217
	0.661664	0.357245
	0.537199	0.428782
	1.60544	1.02075
		1.17453
	Gzmb
	WT	Pdk1fl/fl::Cd4-Cre
	1.33933	2.66533
	1.81347	1.42698
	1.18742	1.97921
	0.53251	1.62861
	0.49515	2.89669
	0.63211	5.35434
	Id2
	WT	Pdk1fl/fl::Cd4-Cre
	1.34505	2.13232
	0.71189	2.92658
	0.61643	3.23267
	1.20275	2.68506
	1.30286	1.25753
	0.82102	1.63627
	Prdm1
	WT	Pdk1fl/fl::Cd4-Cre
	0.81247	9.59441
	0.366093	12.2431
	0.514156	8.54908
	1.03261	7.43995
	1.45524
	1.81943
	Gata3
	WT	Pdk1fl/fl::Cd4-Cre
	0.580765	7.01233
	0.437385	1.81799
	0.27091	1.02462
	2.01203	6.6991
	1.22656	0.527201
	1.47235	1.46
	1.21162	1.6336
	0.703017	2.43373
	0.816679	3.74742
	1.0859	2.04655
	1.20643	0.862118
	0.97636	1.0849
