# Supplementary material for: The kinase PDK1 is critical for promoting T follicular helper cell differentiation
Source: eLife. 2021 Feb 17;10:e61406. doi: 10.7554/eLife.61406 (PMC7889074; doi:10.7554/eLife.61406)
Supplement: Figure 6—figure supplement 1—source data 1. [file elife-61406-fig6-figsupp1-data1.xlsx]

## Sheet: Fig6S-1
Figure 6-figure supplement 1-source data 1
Analysis of p-PKCζ/λ level and validation of overexpression efficiency
Figure 6S-1 A
	MFI (PKCζ/λ)
	WT	Pdk1fl/fl::Cd4-Cre
	242	238
	288	275
	342	373
Figure 6S-1 B
	Stat3			Tcf7			Bcl6			Cxcr5
	EV	STAT3-CA		EV	TCF1		EV	Bcl-6		EV	CXCR5
	14.2654	30.0663		172.412	894.093		0.041852	145.13		0.095295	383.147
	14.3982	28.8845		166.021	1083.55		0.060123	158.323		0.138925	365.528
	13.8444	27.6939		187.793	1258.4		0.049435	153.488		0.120768	344.425
