# Supplementary material for: The kinase PDK1 is critical for promoting T follicular helper cell differentiation
Source: eLife. 2021 Feb 17;10:e61406. doi: 10.7554/eLife.61406 (PMC7889074; doi:10.7554/eLife.61406)
Supplement: Figure 6—source data 1. [file elife-61406-fig6-data1.xlsx]

## Sheet: Fig6
Figure 6-source data 1
PDK1 regulates Tfh cell differentiation via mTORC1 and mTORC2 signal dependent TCF1 expression
Figure 6 B
	MFI (AKT)			MFI (p-AKTT308)			MFI (p-AKTS473)
	WT	Pdk1fl/fl::Cd4-Cre		WT	Pdk1fl/fl::Cd4-Cre		WT	Pdk1fl/fl::Cd4-Cre
	255	211		1427	638		423	293
	274	109		1295	553		428	258
	229	105		1355	511		423	244
	266	169		1015	547		427	210
Figure 6 C
	MFI (FoxO1)			MFI (p-FoxO1/3a)			MFI (p-S6S235/236)
	WT	Pdk1fl/fl::Cd4-Cre		WT	Pdk1fl/fl::Cd4-Cre		WT	Pdk1fl/fl::Cd4-Cre
	3694	1936		254	202		1026	185
	4011	2534		245	180		1255	178
	3608	2641		268	157		760	177
	3487	2163		260	136		1107	162
	MFI (STAT3)			MFI (p-STAT3S727)			MFI (Hif1a)
	WT	Pdk1fl/fl::Cd4-Cre		WT	Pdk1fl/fl::Cd4-Cre		WT	Pdk1fl/fl::Cd4-Cre
	16787	11931		1534	1131		259	204
	18122	12707		1519	930		184	155
	20881	12648		1327	931		313	177
	19838	8440		1587	943		255	207
	20793	5952					305	187
	22238	12030					307	185
	MFI (GSK3β)			MFI (p-GSK3βS9)			MFI (TCF1)
	WT	Pdk1fl/fl::Cd4-Cre		WT	Pdk1fl/fl::Cd4-Cre		WT	Pdk1fl/fl::Cd4-Cre
	4590	4649		1044	632		4549	1730
	4927	5046		1022	627		5687	1106
	2495	5165		1016	705		5030	2246
	3899	4700					4692	2090
	3975	5417
Figure 6 D and E
	% (SLAM-CXCR5+ Tfh)
	WT	Pdk1fl/fl::Rosa26CreER
	EV	EV	STAT3-CA	TCF1	Bcl-6	CXCR5
	53.7	19.2	34.2	30.6	53.2	41
	53.6	18	19.6	33.4	57.4	33.2
	58.9	10.3	27.1	34.4	51.9	49.5
			38.7
	N (SLAM-CXCR5+ Tfh)x104
	WT	Pdk1fl/fl::Rosa26CreER
	EV	EV	STAT3-CA	TCF1	Bcl-6	CXCR5
	7.60188	0.167995	4.98516	3.97401	21.0674	0.974501
	5.6908	0.434951	1.98003	4.39249	9.93254	0.515456
	19.9682	0.065815	5.47194	4.78404	31.755	0.297485
			9.91889
